# Supplementary material
Source: publisher site journal article supplement (https://static.cambridge.org/content/id/urn:cambridge.org:id:article:S0033822219000377/resource/name/S0033822219000377supp001.docx)
Supplement: Supplementary file 1 [file S0033822219000377supp001.docx]

D_Sequence(Italus Sequence)

{

R_Date("LTL17796A", 1222, 45);

Gap(47);

R_Date("LTL17797A", 1234, 45);

Gap(44);

R_Date("LTL17235A", 1205, 45);

Gap(16);

R_Date("LTL17236A", 1134, 45);

Gap(51);

R_Date("LTL17113A", 1059, 45);

Gap(45);

R_Date("LTL17111A", 1006, 45);

Gap(4);

R_Date("LTL17114A", 1071, 45);

Gap(48, 0);

R_Date("LTL17112A", 943, 45);

};
